# Supplementary material for: Effects of infill patterns on resistance-dependent strain and ammonia gas sensing behaviors of 3D-printed thermoplastic polyurethane modified with polypyrrole
Source: Royal Society of Chemistry journal article supplement (doi:10.1039/d2tc00240j), 2022-01-01
Supplement: d2tc00240j1.pdf [file d2tc00240j1.pdf]

## Supplemental files

# **Effects of infill patterns on resistance-dependent strain and ammonia gas sensing behaviors of 3D-printed thermoplastic polyurethane modified with polypyrrole**

Yeon Jae Kim<sup>a</sup>, Jong Seob Choi<sup>b\*</sup>, and Jin-Heong Yim<sup>a\*</sup>

<sup>a</sup> Division of Advanced Materials Engineering, Kongju National University, Budaedong 275, Seobuk-gu, Cheonan-si, Chungnam, 31080, South Korea

<sup>b</sup> Department of Biomedical Engineering, Johns Hopkins University, Baltimore, MD 21205, United States

\*These authors contributed equally to this work.

Correspondence and requests for materials should be addressed to J. S. Choi (jchoi160@jhu.edu) or J.-H. Yim (jhyim@kongju.ac.kr, Fax: +82-41-568-5776).

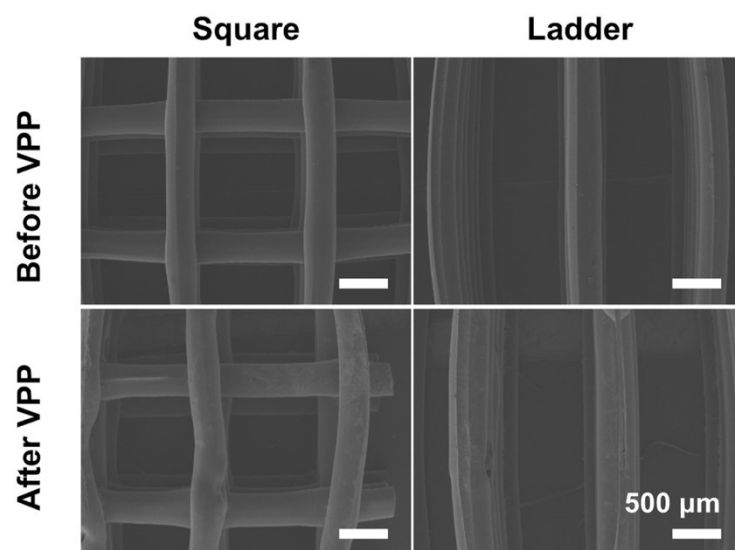

**Fig. S1** Representative SEM images of different infill patterns (square & ladder) of TPU before/after VPP with PPy.

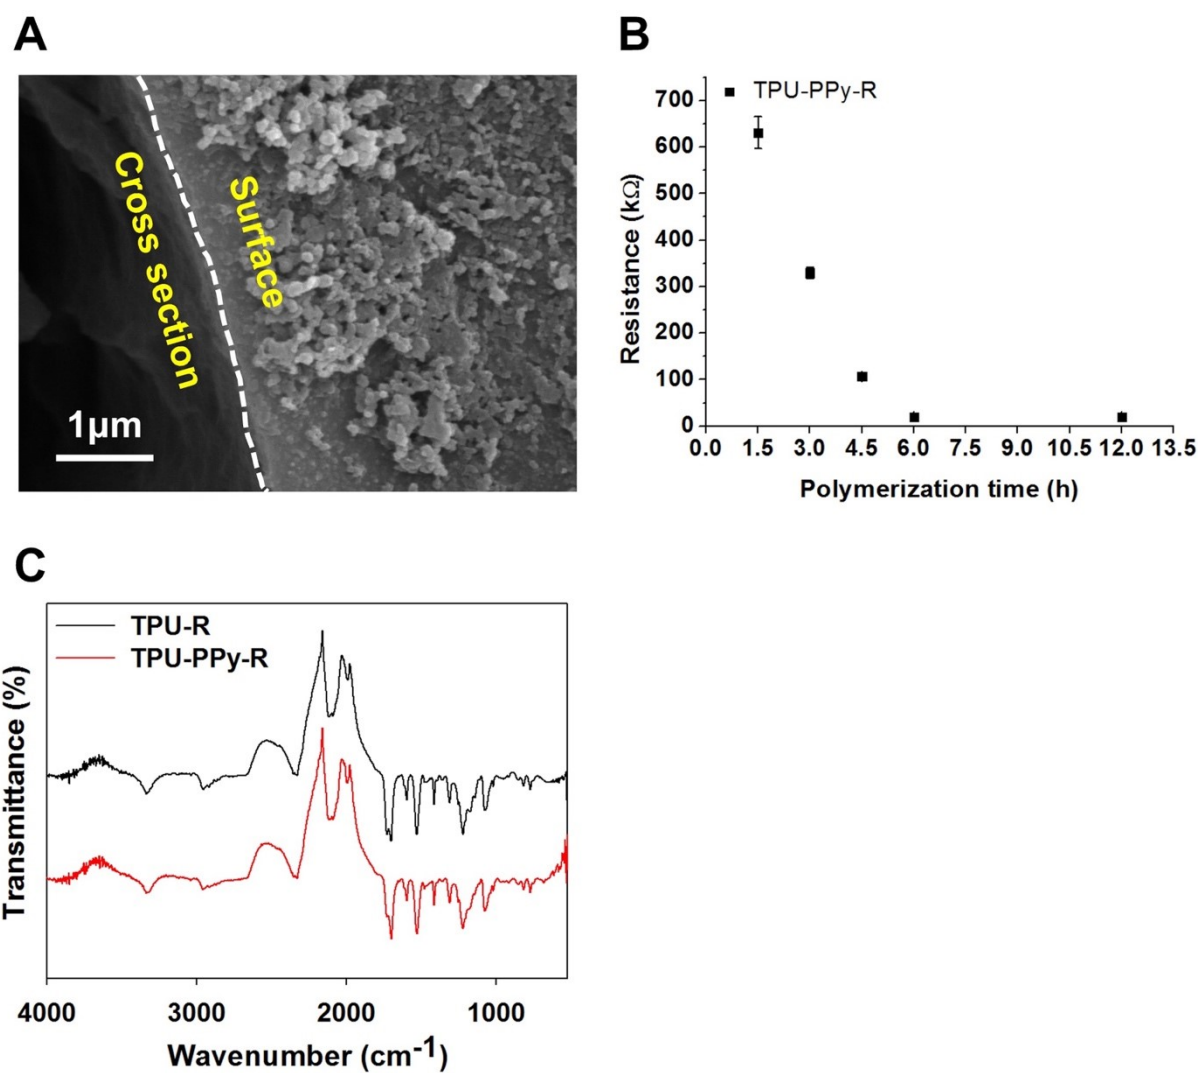

**Fig. S2** (A) representative SEM image of PPy on the TUP after VPP, (B) Resistance changes as a function of time of VPP, (C) FT-IR spectra before/after VPP

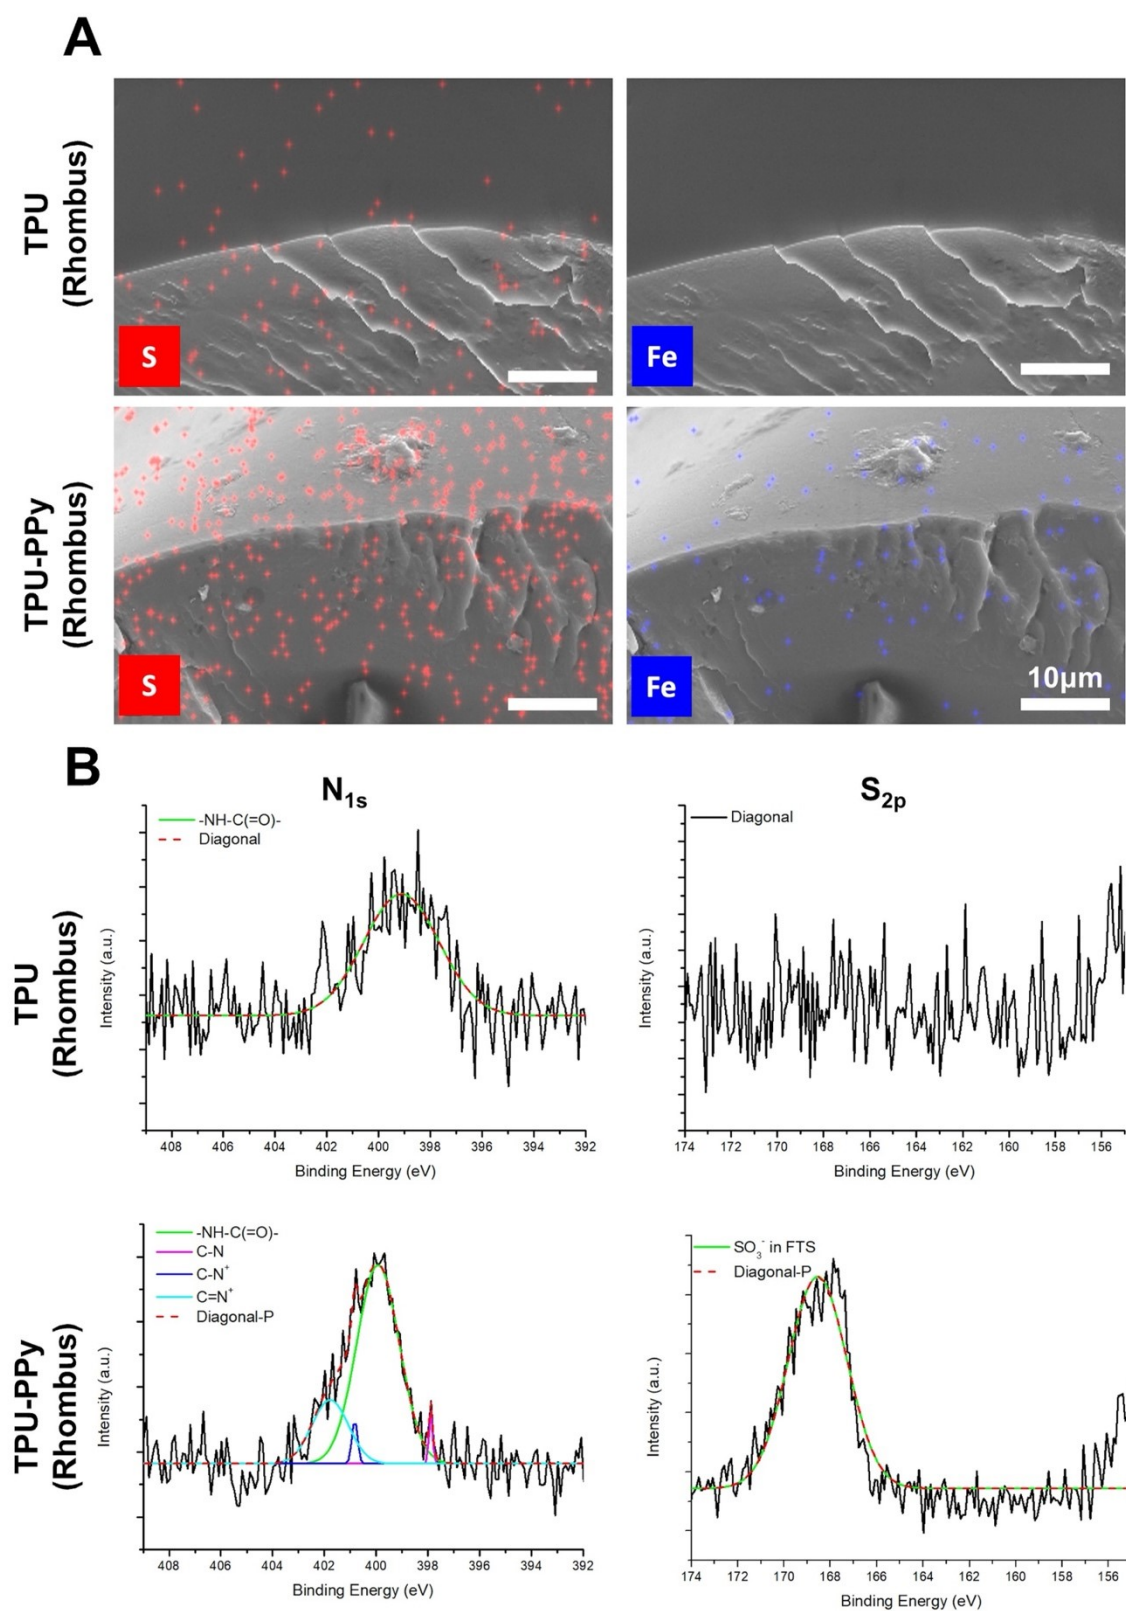

**Fig. S3** Chemical characterization of TPU, and TPU-PPy. (A) EDS elemental mapping, (B) XPS spectra.

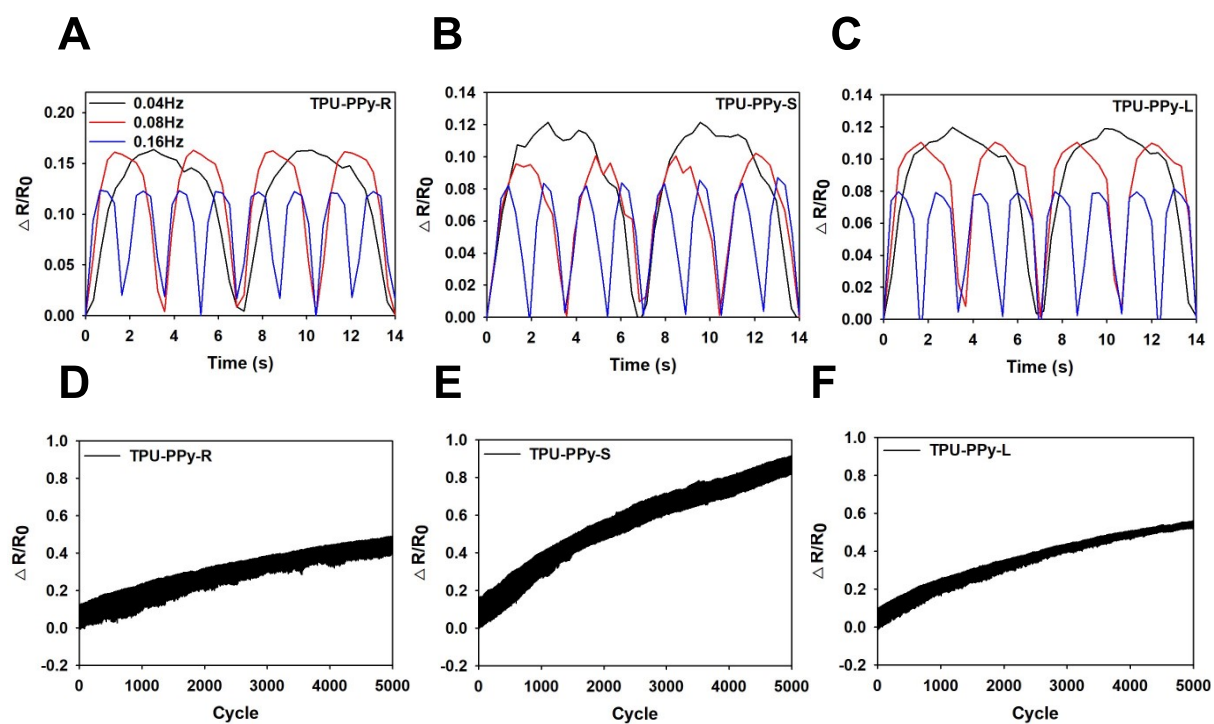

**Fig. S4** Strain sensor behavior of TPU-PPy composites. (A-C) 10% applied strain at different strain rates, (E-F) Durability test for 5000 cycles at 10% applied strain.

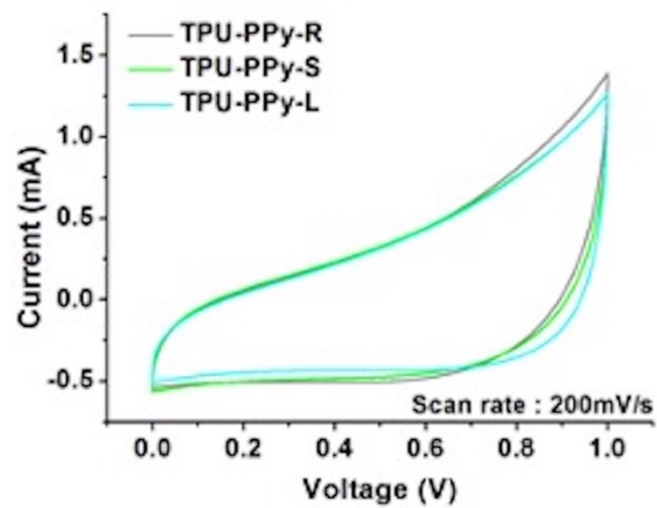

**Fig. S5** I-V hysteresis with respect to different infill patterns

**Table S1. Element wt.% of rhombus infill pattern of TPU, and TPU-PPy.**

| <b>Element</b> | <b>norm C (wt%)</b> |                  |
|----------------|---------------------|------------------|
|                | <b>TPU-R</b>        | <b>TPU-PPy-R</b> |
| <b>C</b>       | <b>67.57</b>        | <b>71.01</b>     |
| <b>O</b>       | <b>24.1</b>         | <b>20.16</b>     |
| <b>N</b>       | <b>8.13</b>         | <b>7.16</b>      |
| <b>S</b>       | <b>0.21</b>         | <b>1.58</b>      |
| <b>Fe</b>      | <b>0</b>            | <b>0.09</b>      |
